# Supplementary material
Source: publisher site journal article supplement (https://www.dovepress.com/article/487309)
Supplement: Supplementary file 1 [file get_supplementary_file.php]

**Supplement**

| **Table S1** Parameters of principal components | | | | | | | | | | | | | |
| --- | --- | --- | --- | --- | --- | --- | --- | --- | --- | --- | --- | --- | --- |
|  | | **Component** | | | | | | | | | |  | |
|  | | **1** | | **2** | | **3** | | **4** | | **5** | | **Uniqueness** | |
| Non-HDL, mmol/l |  | 0.95899 |  | -0.02802 |  | 0.0456 |  | 0.0799 |  | 0.22115 |  | 0.0222 |  |
| LDL, mmol/l |  | 0.94719 |  | 0.14321 |  | 0.0362 |  | 0.0619 |  | -0.01860 |  | 0.0768 |  |
| TCHOL, mmol/l |  | 0.94597 |  | -0.08276 |  | 0.0257 |  | 0.1279 |  | -0.13723 |  | 0.0625 |  |
| HOMA-IR |  | -0.03729 |  | 0.86527 |  | 0.2659 |  | 0.1925 |  | 0.19488 |  | 0.1042 |  |
| Insulin, μU/ml |  | -0.05126 |  | 0.82916 |  | 0.2816 |  | 0.2040 |  | 0.21505 |  | 0.1427 |  |
| FBG, mmol/l |  | 0.09406 |  | 0.68700 |  | -0.0340 |  | -0.0342 |  | -0.11696 |  | 0.5032 |  |
| Diastolic BP* |  | 0.06428 |  | 0.00655 |  | 0.8397 |  | 0.0918 |  | -0.05016 |  | 0.2798 |  |
| Systolic BP* |  | -0.00200 |  | 0.20687 |  | 0.8148 |  | -0.1177 |  | 0.02804 |  | 0.2787 |  |
| hsCRP, mg/l |  | 0.03430 |  | 0.13653 |  | 0.5205 |  | 0.3000 |  | 0.14748 |  | 0.5975 |  |
| KPRT, 4min |  | 0.06186 |  | 0.14174 |  | 0.0421 |  | 0.8103 |  | 0.02453 |  | 0.3171 |  |
| KPRT, 3min |  | 0.03698 |  | 0.06861 |  | -0.0441 |  | 0.7196 |  | 0.00496 |  | 0.4741 |  |
| HR, beats per min |  | 0.10142 |  | -0.01701 |  | 0.1445 |  | 0.5715 |  | -0.01167 |  | 0.6418 |  |
| TG, mmol/l |  | 0.18336 |  | 0.17012 |  | 0.0427 |  | 0.1216 |  | 0.79833 |  | 0.2835 |  |
| HDL, mmol/l |  | 0.15433 |  | -0.11490 |  | -0.0314 |  | 0.1112 |  | -0.67615 |  | 0.4925 |  |
| RCHOL, mmol/l |  | 0.07414 |  | -0.47318 |  | 0.0168 |  | 0.0578 |  | 0.65259 |  | 0.3411 |  |
| **Notes:** The table represents parameters of principal components. Each principal component includes all 15 measured parameters; loadings greater than 0.5 or -0.5 are considered influential. Uniqueness represents the variance of data across all principal components that are not included in the analysis (the greater the coefficient of uniqueness the lesser the variance of parameter). *Blood pressure/mm Hg  **Abbreviations:** Non-HDL, non-high-density lipoprotein; LDL, low-density lipoprotein; TCHOL, total cholesterol; HOMA-IR, homeostatic model assessment for insulin resistance; FBG, fasting blood glucose; BP, blood pressure; hsCPR, high-sensitivity C-reactive protein; KPRT HR, Kasch Pulse Recovery Test; HR, heart rate; TG, triglycerides; HDL, high-density lipoprotein; RCHOL, remnant cholesterol. | | | | | | | | | | | | | |
|  | | | | | | | | | | | | | |
